# Supplementary material
Source: Springer Nature journal article supplement (https://www.springermedizin.de/resource/supplementary/13020_2013_201_MOESM3_ESM.pdf/9641246)

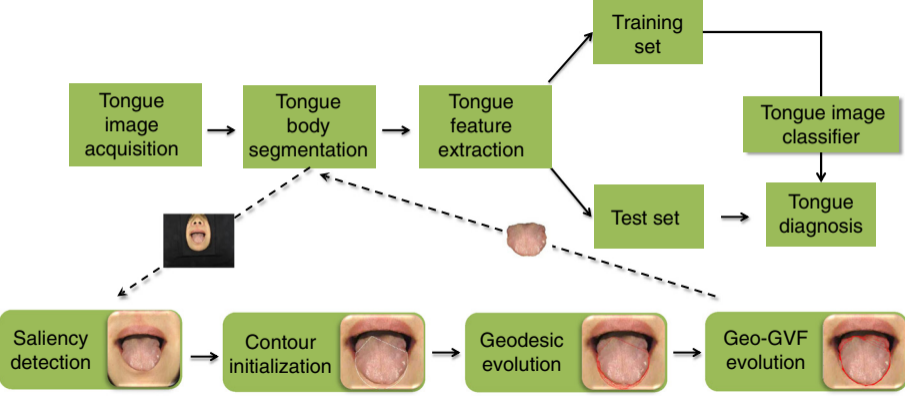

Supplement: MOESM3 [file 9641246]
